# Supplementary material
Source: PubMed Central journal article supplement (PMC6756967)

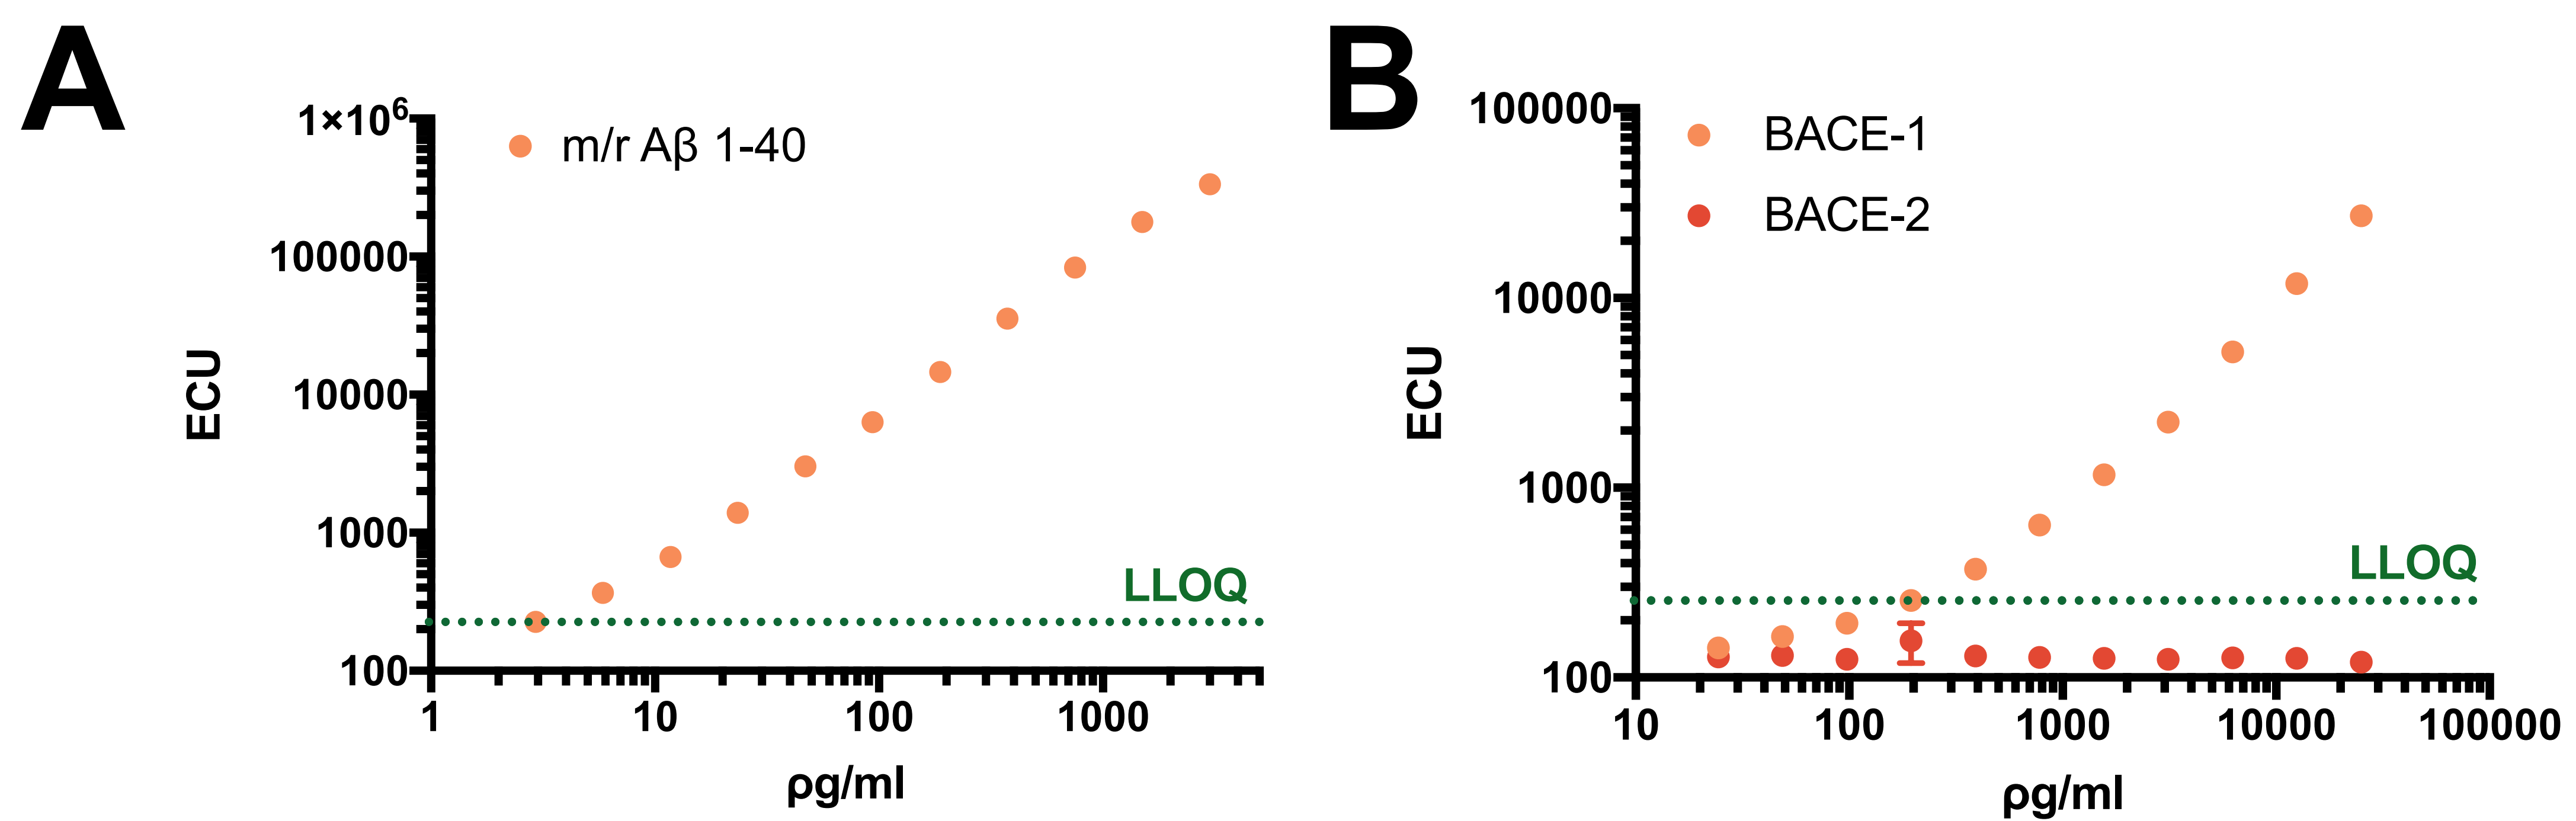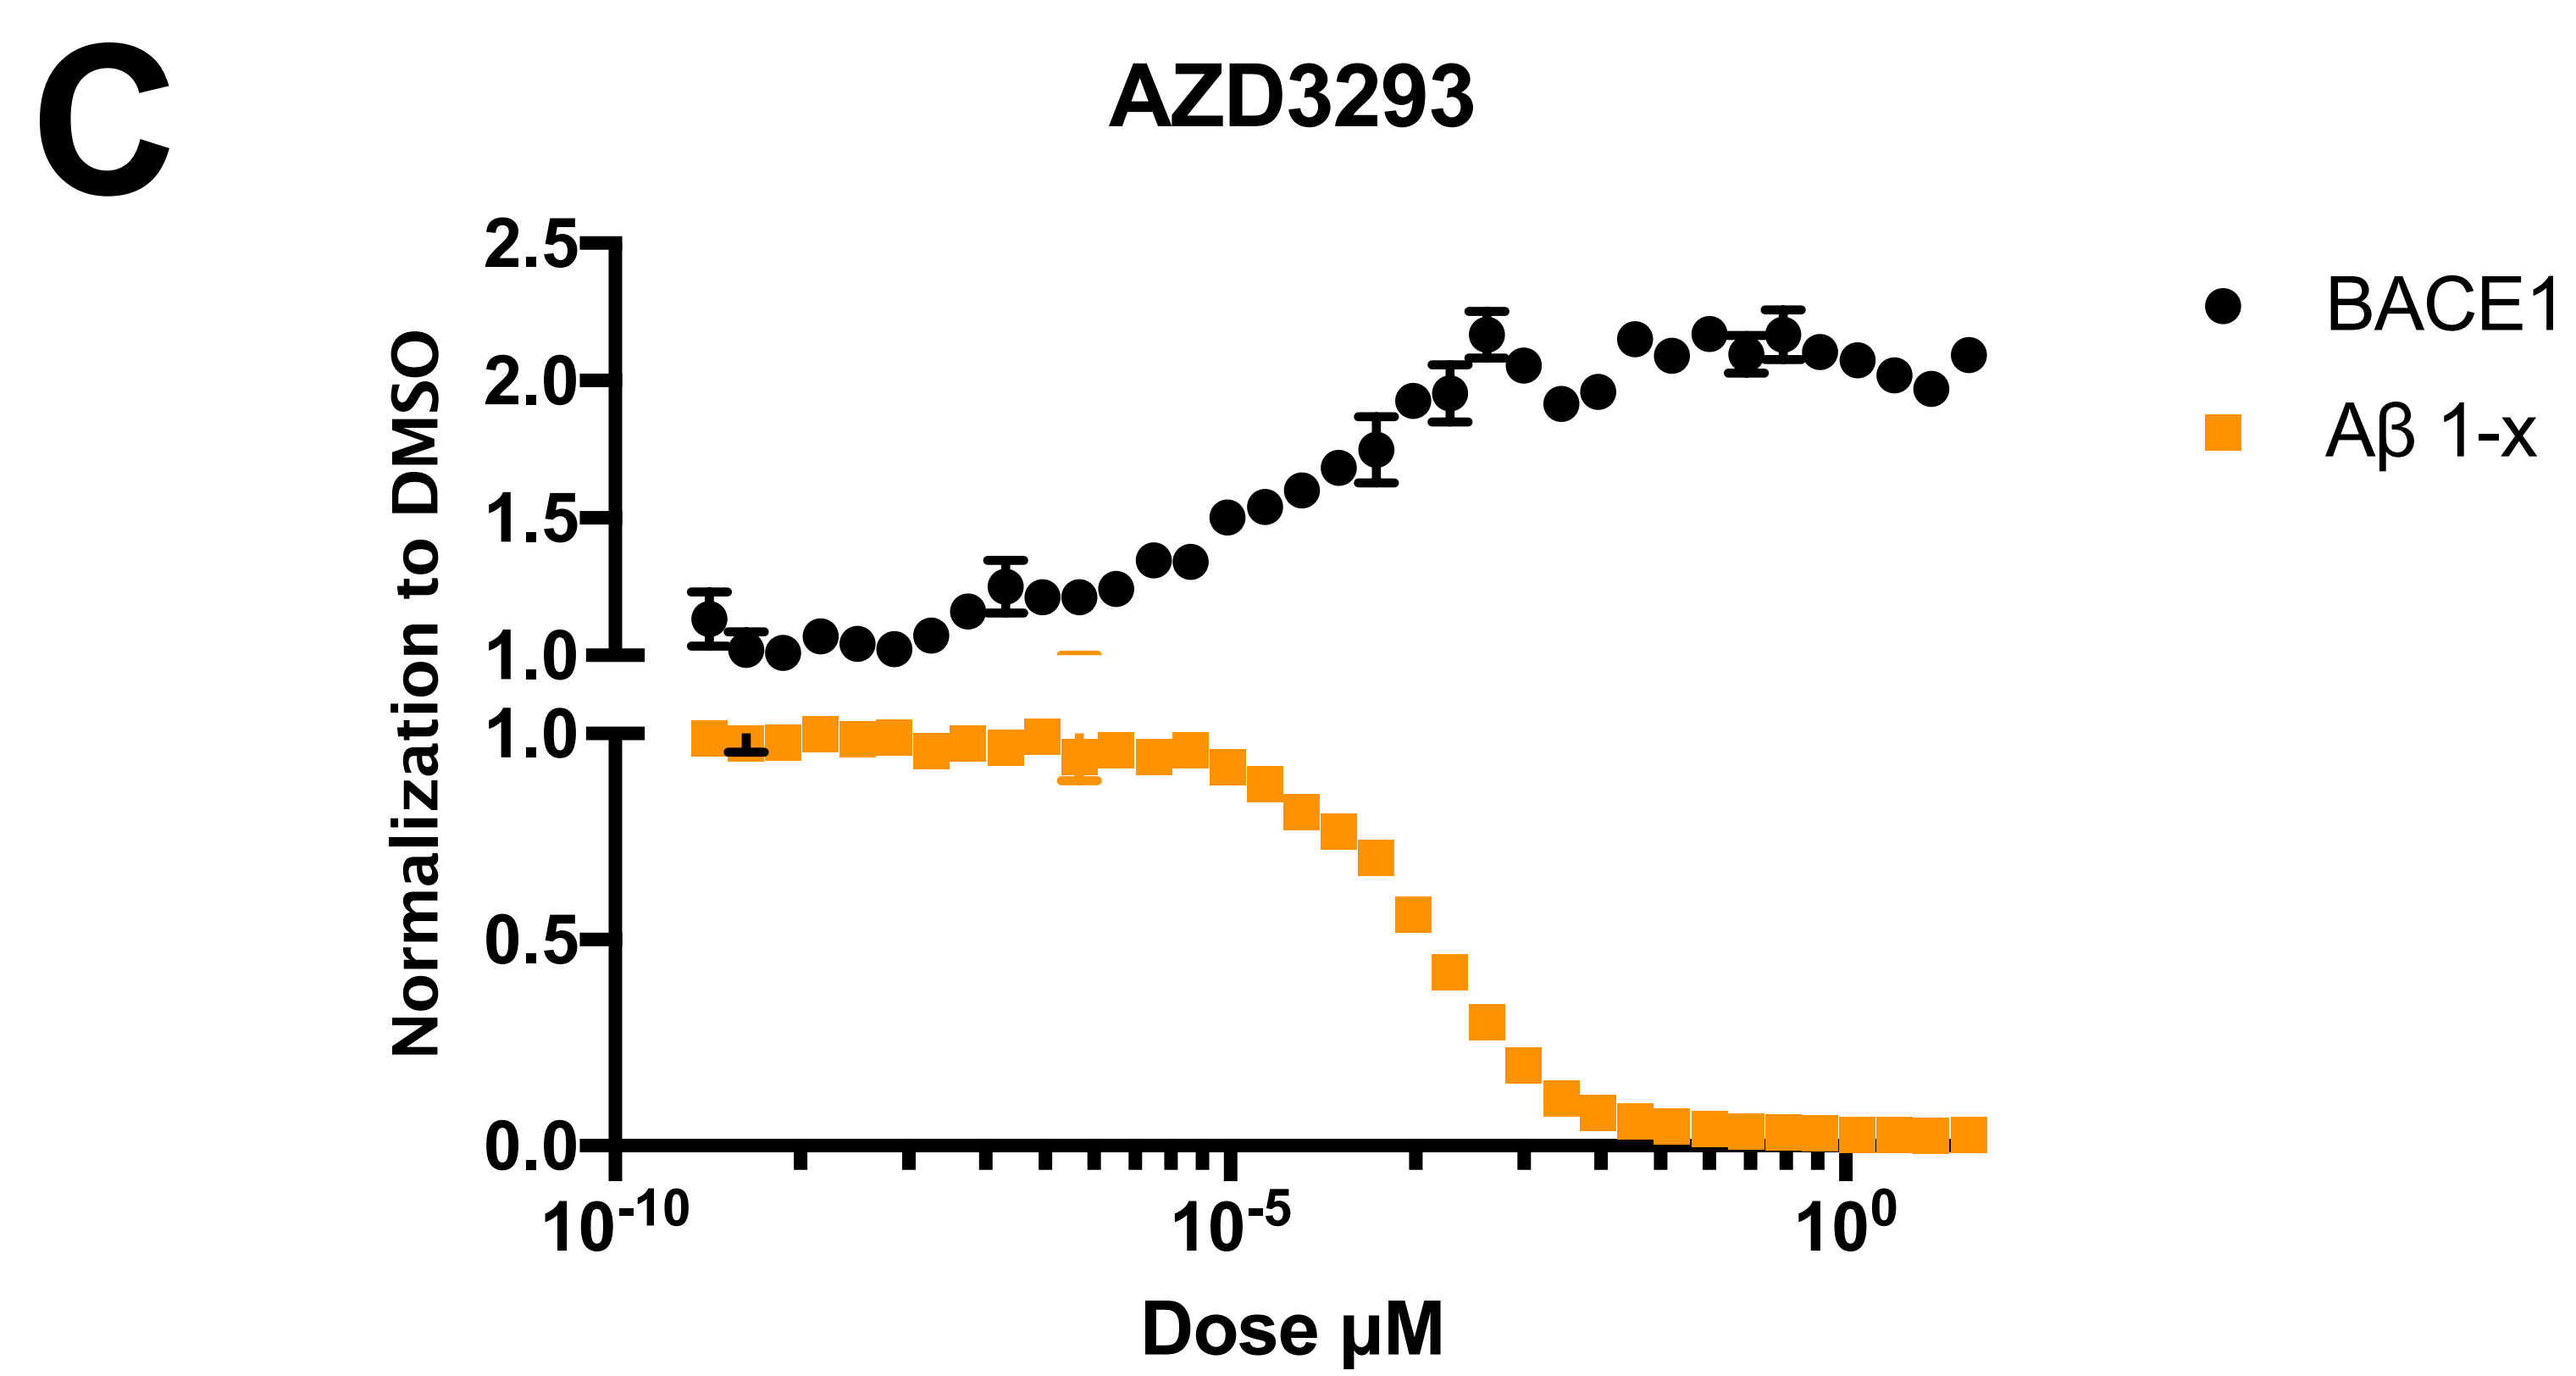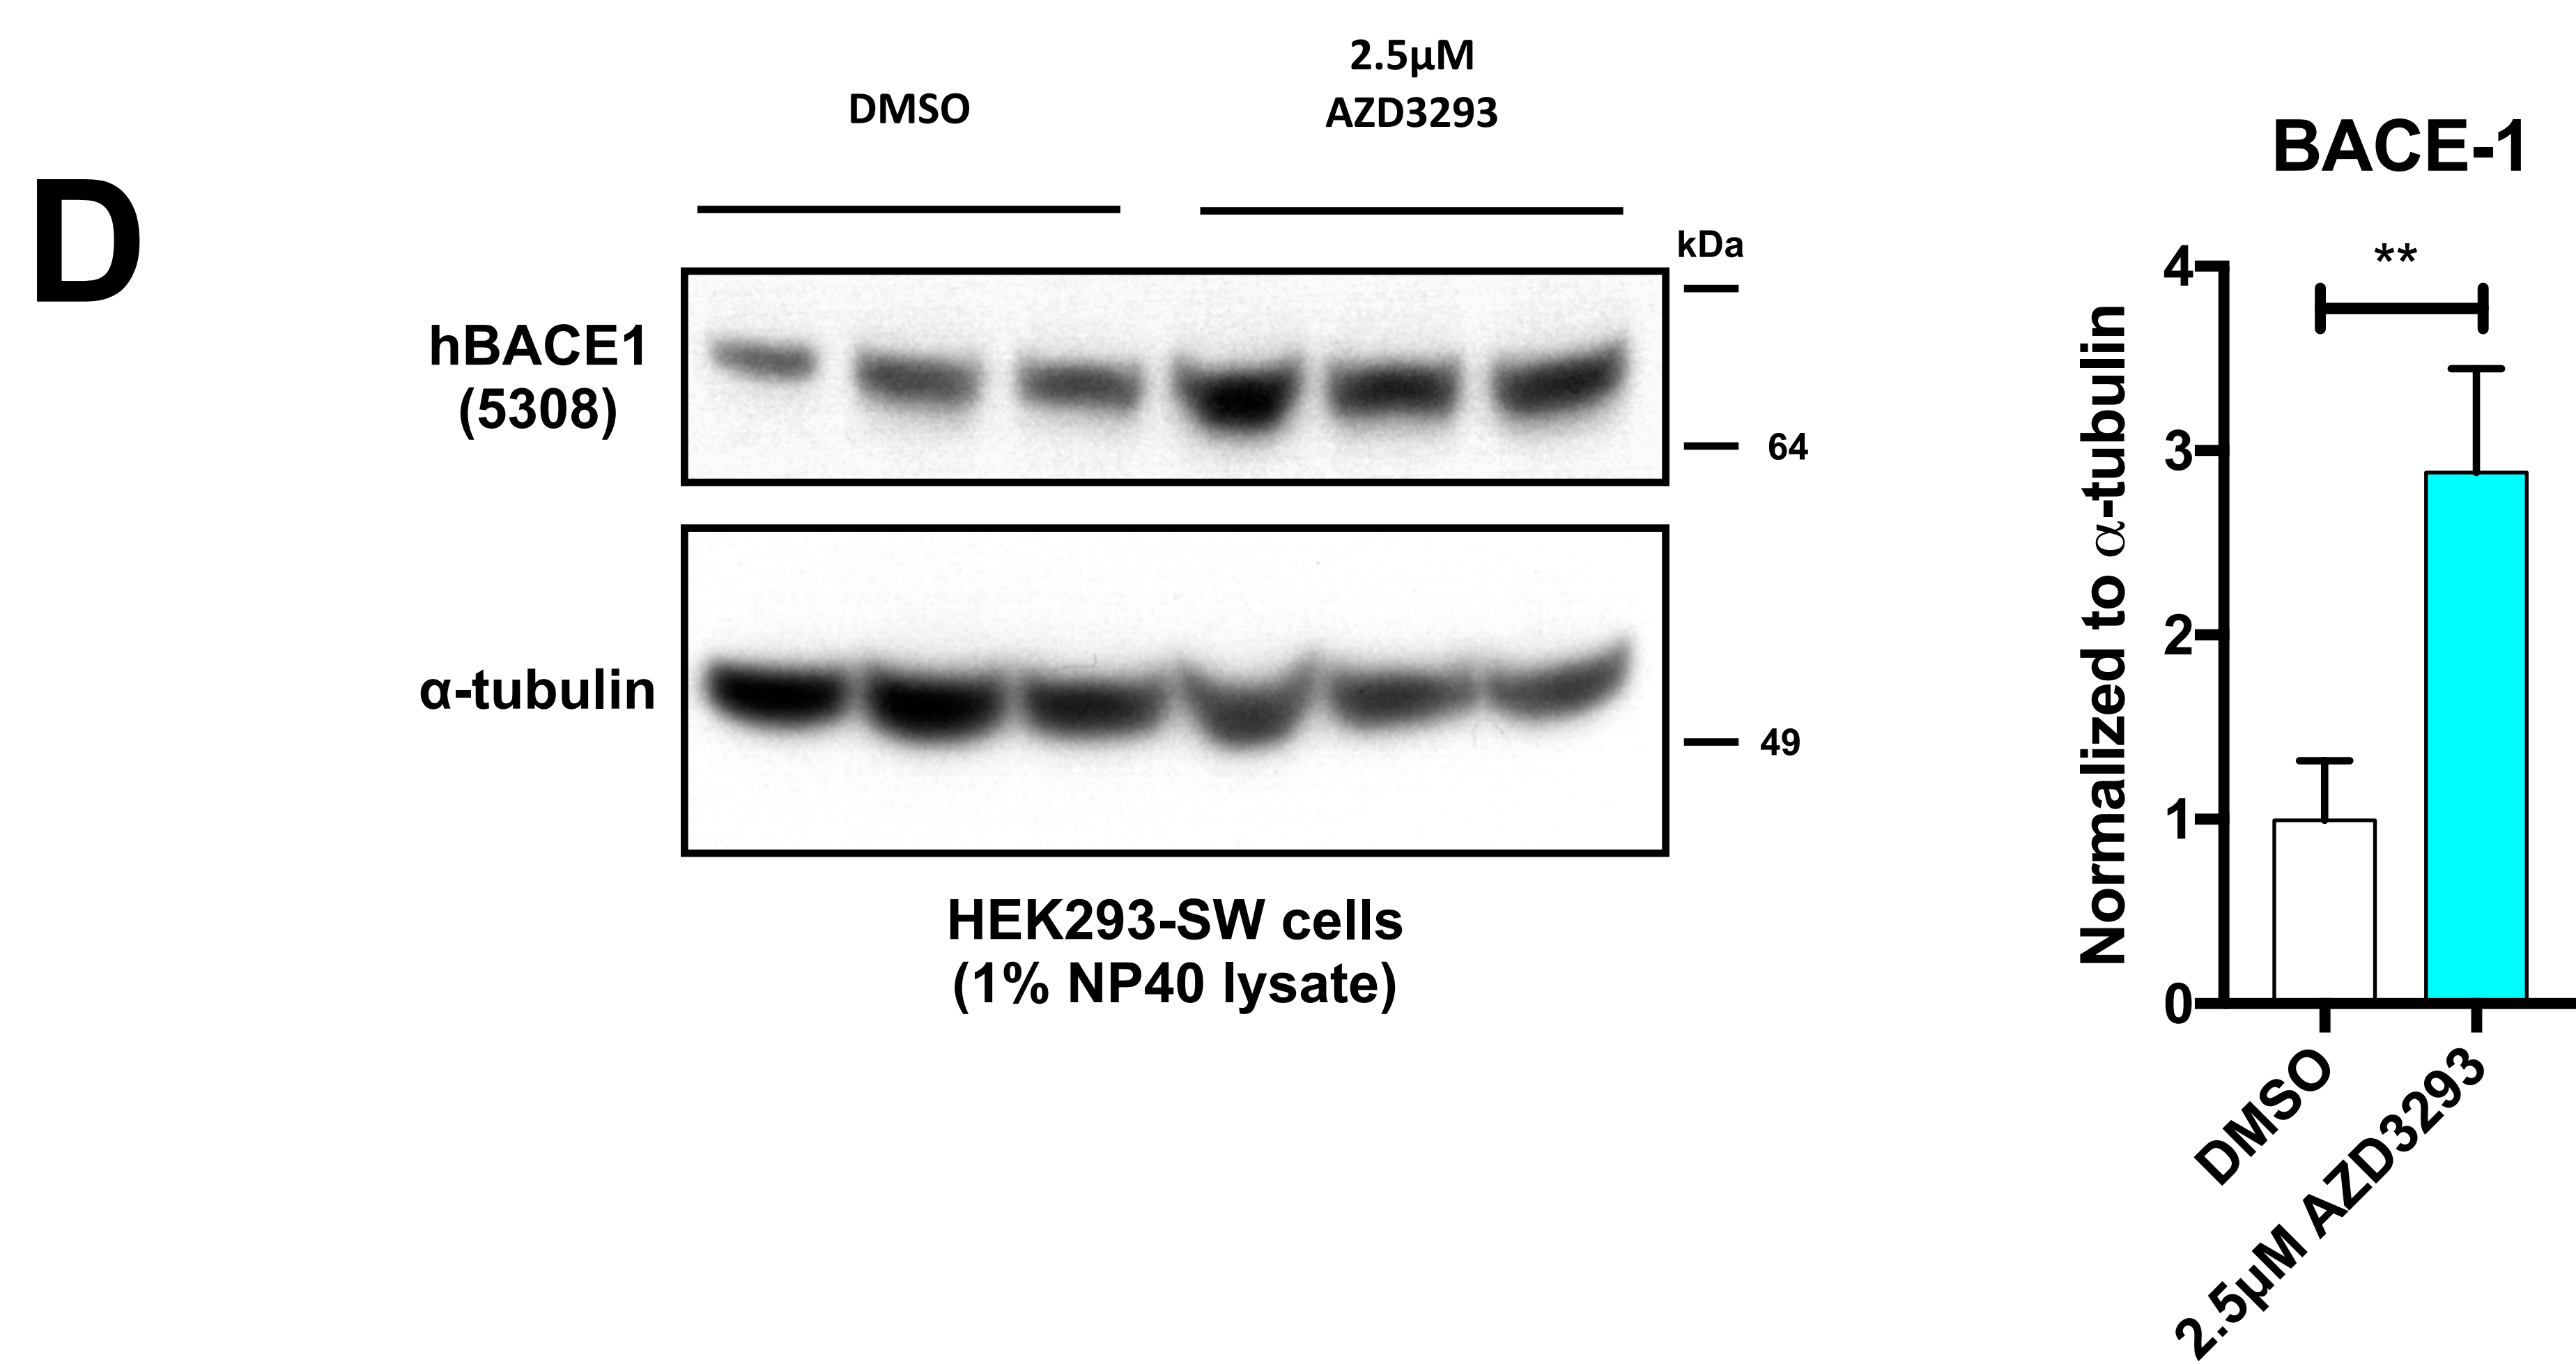

Fig.S1

Supplement: NIHMS1532924-supplement-1.pdf [file NIHMS1532924-supplement-1.pdf]

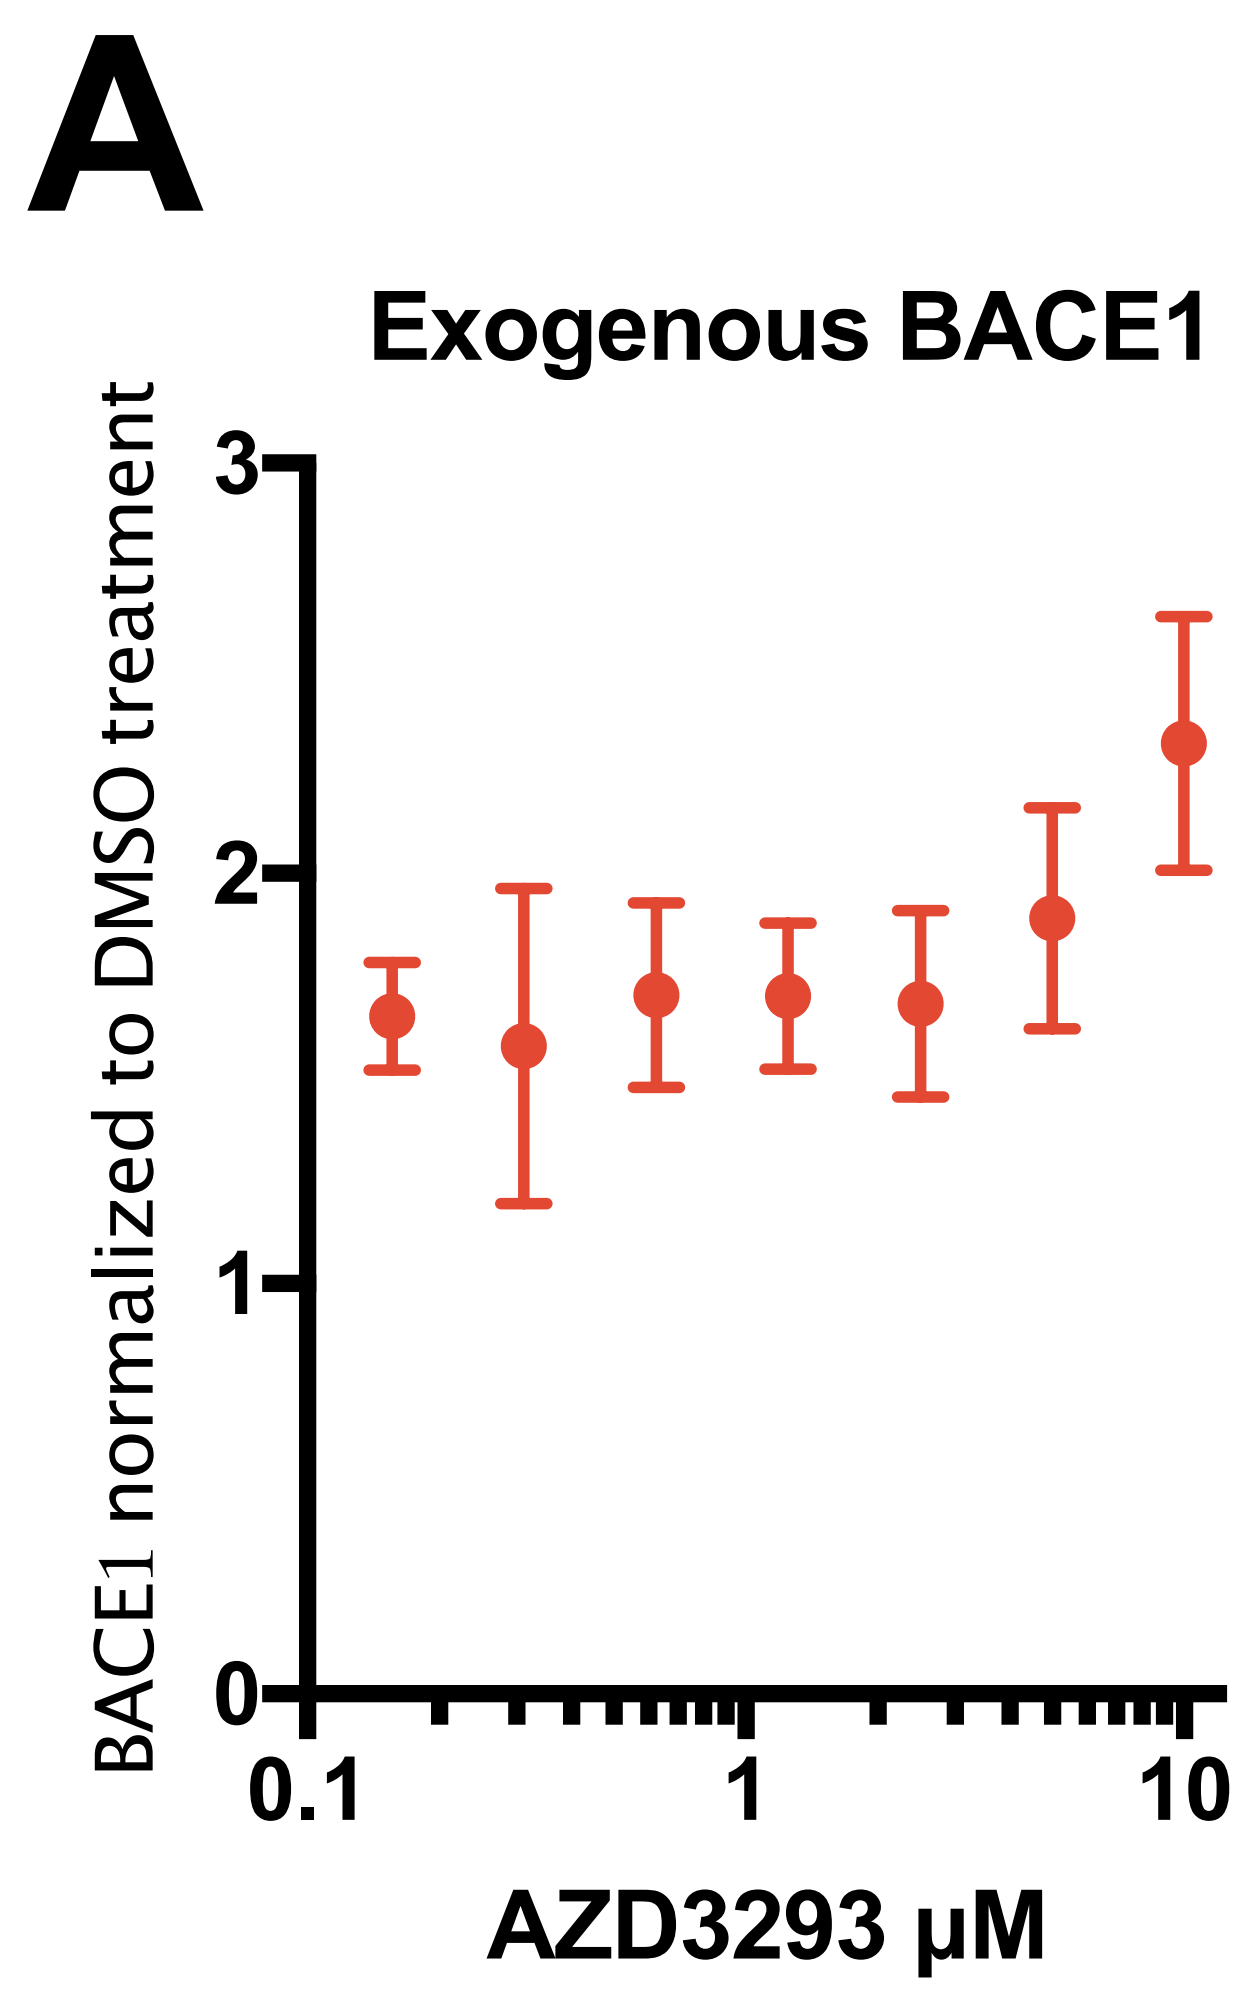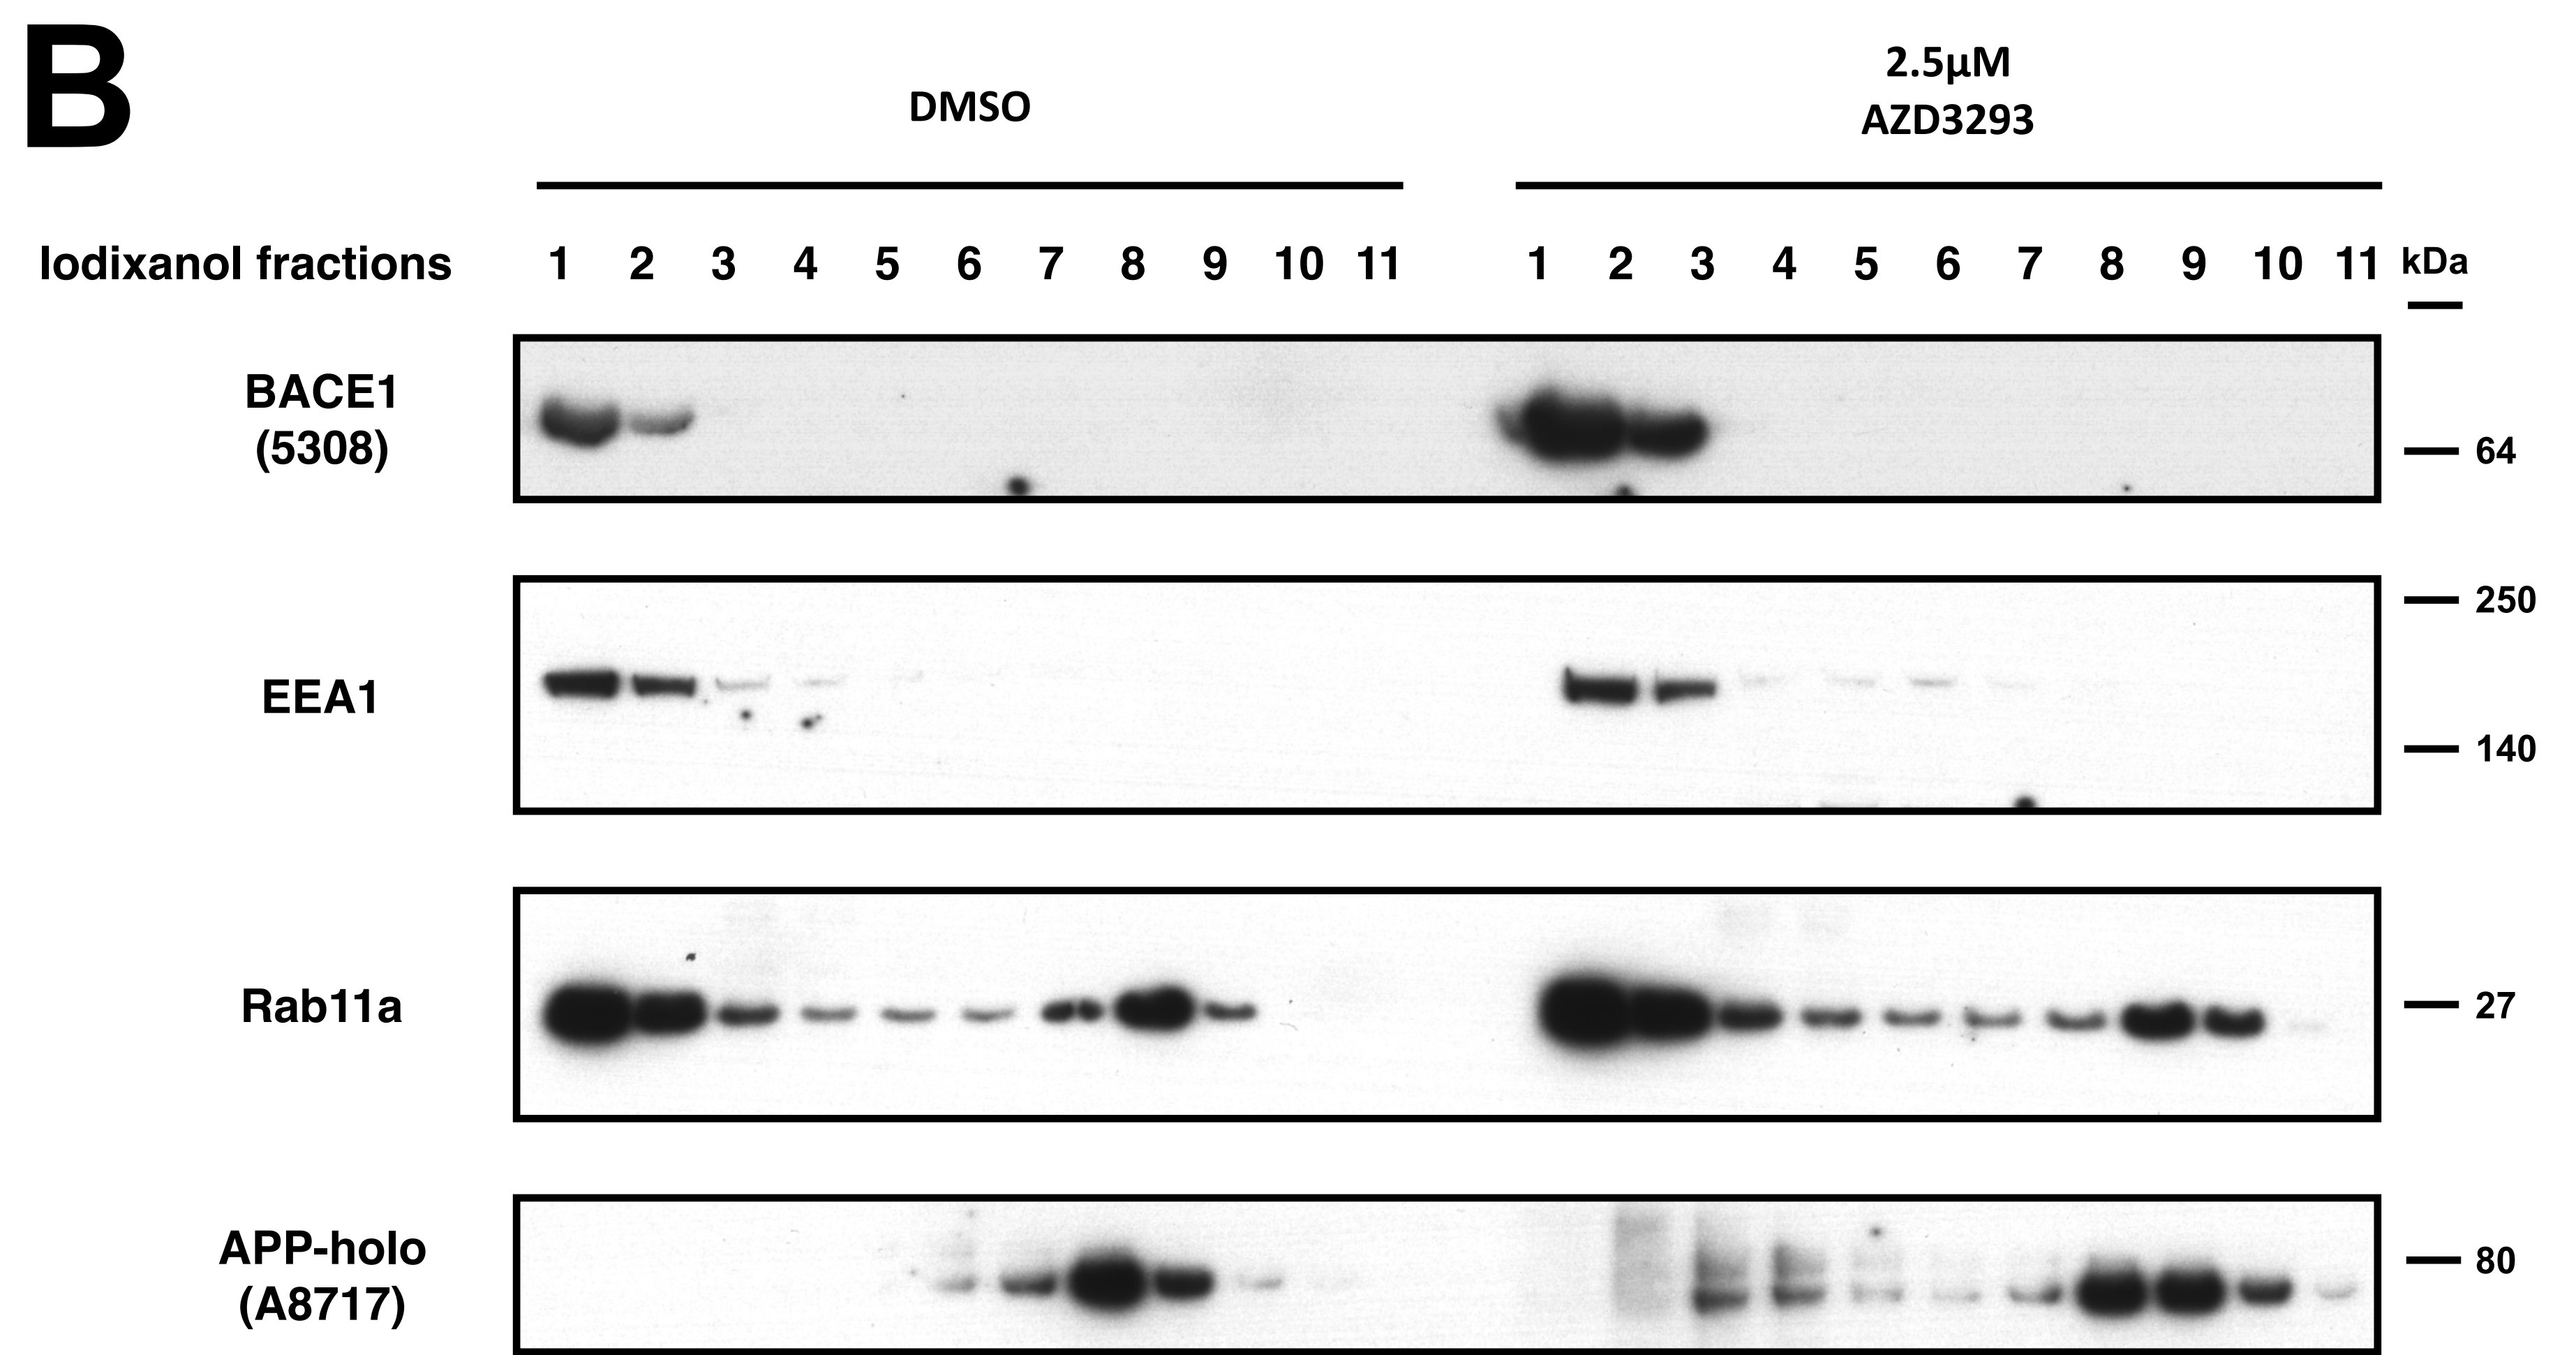

**Fig.S2**

Supplement: NIHMS1532924-supplement-2.pdf [file NIHMS1532924-supplement-2.pdf]
